# Supplementary material for: The 2EF Antibody Targets a Unique N-Terminal Epitope of Trop-2 and Enhances the In Vivo Activity of the Cancer-Selective 2G10 Antibody
Source: Cancers (Basel). 2023 Jul 22;15(14):3721. doi: 10.3390/cancers15143721 (PMC10378344; doi:10.3390/cancers15143721)
Supplement: Supplementary file 1 [file cancers-15-03721-s001.zip › Table S1.xlsx]

## Sheet: Table S1A
	Supplementary Table 1A: Depth penetration of Hu2EF versus Hu2G10 in human prostate cancer - ROI 1.
	(a)																(b)
		au
	Distance	Y1 = 2EF	Y2 = 2G10
	0	1.6667	11
	1.243	3.3579	3.8318
	2.4859	3.7826	8.3787
	3.7289	2.7133	18.586
	4.9718	4.9666	23.3913
	6.2148	11.1876	48.1126
	7.4578	32.9628	53.0498
	8.7007	30.7543	47.2086
	9.9437	30.2754	57.7337
	11.1867	31.9219	56.3125
	12.4296	35.0951	30.7561
	13.6726	72.9185	57.8681
	14.9155	112.004	91.8336
	16.1585	131.434	108.883
	17.4015	124.639	84.7202
	18.6444	110.294	59.9578
	19.8874	78.4568	48.0334
	21.1304	69.577	57.2626
	22.3733	90.0101	61.9679
	23.6163	83.4354	68.3516
	24.8592	73.7971	100.796
	26.1022	93.264	102.773
	27.3452	115.424	81.8507
	28.5881	131.778	87.6667
	29.8311	136.565	86.0032
	31.074	123.849	48.2785
	32.317	95.0555	31.7391
	33.56	73.8047	13.9849
	34.8029	87.8992	17.9509
	36.0459	86.875	28.2609
	37.2889	71.4342	14.1474
	38.5318	45.6156	3.8847
	39.7748	67.6253	19.1865
	41.0177	123.516	53.5381
	42.2607	135.025	84.477
	43.5037	97.853	64.2029
	44.7466	122.743	59.8589
	45.9896	71.6623	48.7996
	47.2325	91.5812	49.925
	48.4755	83.8992	57.3327
	49.7185	51.1405	52.4367
	50.9614	74.892	87.0019
	52.2044	60.4594	41.9307
	53.4474	66.4184	35.5665
	54.6903	60.0042	23.3997
	55.9333	117.22	87.4953
	57.1762	179.333	165
	58.4192	160.321	143.783
	59.6622	101.096	86.4266
	60.9051	90.3548	58.9118
	62.1481	60.9202	61.0517
	63.391	37.8645	39.9464
	64.634	37.3932	50.0397
	65.877	38.9878	45.2205
	67.1199	37.7272	49.7278
	68.3629	39.6623	64.1676
	69.6059	79.6293	91.5322
	70.8488	136.522	94.4052
	72.0918	129.975	139.759																				Distance (µm)
	73.3347	57.9368	110.853
	74.5777	20.8267	39.3976
	75.8207	8.5167	14.6843
	77.0636	9.0765	14.8053
	78.3066	11.2609	12.4802
	79.5496	4.8715	2.4556
	80.7925	7.6944	8.753
	82.0355	3.8859	6.1021
	83.2784	12.6383	13.9773
	84.5214	28.0951	6.983
	85.7644	27	8

## Sheet: Table S1B
	Supplementary Table 1B: Depth penetration of Hu2EF versus Hu2G10 in human prostate cancer - ROI 2.
	(a)																(b)
		au
	Distance	Y1 = 2EF	Y2 = 2G10
	0	5	3
	1.243	6.5702	15.0354
	2.4859	5.6139	16.6789
	3.7289	10.4734	25.987
	4.9718	14.8501	27.8642
	6.2148	26.9776	47.0897
	7.4578	45.5136	59.5289
	8.7007	64.6942	75.5703
	9.9437	80.5761	102.689
	11.1867	100.945	113.62
	12.4296	97.5998	98.6127
	13.6726	64	52.1429
	14.9155	75.7686	101.961
	16.1585	88.817	111.665
	17.4015	74	77.4793
	18.6444	88.8737	76.4451
	19.8874	118.326	78.9658
	21.1304	169.167	107.149
	22.3733	163.096	90.183
	23.6163	97.7533	80.2952
	24.8592	43.3802	26.8737
	26.1022	32.9174	27.4711
	27.3452	38.1429	27.4286
	28.5881	65.9799	38.6671
	29.8311	117.972	108.503
	31.074	115.632	70.1535
	32.317	129.17	58.3884
	33.56	127.47	48.046
	34.8029	89.281	34.7603
	36.0459	53.9162	50.8642
	37.2889	69.8477	62.8737
	38.5318	57.229	39.9669
	39.7748	69.4439	37.9492
	41.0177	88.5714	51
	42.2607	91.8843	48.9669
	43.5037	95.0083	64.3223
	44.7466	106.989	65.3778
	45.9896	122.552	49.987
	47.2325	124.048	55.5266
	48.4755	105.071	39.4109
	49.7185	69.9906	21.7296
	50.9614	66.477	11.0968
	52.2044	19.4876	11.9752
	53.4474	27.5384	6.9067
	54.6903	17	2.5714
	55.9333	6.1913	2.5041
	57.1762	14.1606	2.7662
	58.4192	66.8548	15.9351
	59.6622	101.797	29.3093
	60.9051	146.826	56.157
	62.1481	139.005	68.8524
	63.391	119.704	92.6021
	64.634	87.7804	91.6139
	65.877	111.431	78.0035
	67.1199	98.7403	37.5691
	68.3629	81	38.1429
	69.6059	96.9504	55.2149
	70.8488	84.974	55.1157
	72.0918	82.2963	44.1074
	73.3347	61.0118	51.9693
	74.5777	90.5396	63.7426
	75.8207	96.1452	81.059
	77.0636	104.168	70.4061
	78.3066	112.612	75.405
	79.5496	34.68	50.5195
	80.7925	8.8347	26.0933
	82.0355	15.2857	25.2857
	83.2784	63.49	46.9681
	84.5214	49.3601	34.5407
	85.7644	26.1771	24.4994
	87.0073	15.8512	6.6694
	88.2503	17.6553	6.9315
	89.4932	14.4758	8.5325
	90.7362	17.0425	15.6305
	91.9792	27.7839	33.1417
	93.2221	23.3872	38.8654
	94.4651	8.0602	25.392
	95.7081	9	3

## Sheet: Table S1C
	Supplementary Table 1C: Depth penetration of Hu2EF versus Hu2G10 in human prostate cancer - ROI 3.
	(a)																	(b)
		au
	Distance	Y1 = 2EF	Y2 = 2G10
	0	20	30
	1.243	21.1387	19.455
	2.4859	19.0741	29.1375
	3.7289	13.9123	20.7937
	4.9718	4.4959	7.328
	6.2148	14.4415	27.0402
	7.4578	37.4295	69.2661
	8.7007	73.6304	84.6969
	9.9437	100.511	107.241
	11.1867	96.6248	85.4088
	12.4296	90.8391	79.2131
	13.6726	80.2555	88.454
	14.9155	55.5925	71.239
	16.1585	33.8219	48.4642
	17.4015	35.9888	34.0091
	18.6444	30.2422	37.7286
	19.8874	46.661	84.0691
	21.1304	54.7197	62.3566
	22.3733	82.5239	87.3602
	23.6163	137.227	95.0466
	24.8592	131.679	88.4602
	26.1022	132.981	81.5553
	27.3452	127.018	69.0611
	28.5881	85.5074	36.8642
	29.8311	64.6267	52.5291
	31.074	73.809	47.1639
	32.317	72.6988	45.0258
	33.56	72.3715	58.925
	34.8029	99.1022	58.9678
	36.0459	112.031	94.2875
	37.2889	114.215	67.8825
	38.5318	104.469	43.8503
	39.7748	96.9173	53.1642
	41.0177	77.6583	49.9079
	42.2607	88.1883	30.4799
	43.5037	103.242	33.0171
	44.7466	106.622	74.724
	45.9896	127.385	75.5536
	47.2325	90.1065	63.5379
	48.4755	127.312	83.432
	49.7185	164.758	118.434
	50.9614	98.5506	83.2548
	52.2044	187.7	141.167
	53.4474	70.5477	51.6411
	54.6903	45.5924	13.3369
	55.9333	45.2183	22.3116
	57.1762	49.8244	33.1703
	58.4192	62.819	47.7916
	59.6622	96.7032	58.9874
	60.9051	155.402	64.9213
	62.1481	156.071	55.3522
	63.391	131.67	32.7714
	64.634	92.9904	37.9347
	65.877	76.0269	26.123
	67.1199	71.5875	35.4312
	68.3629	73.1614	34.6652
	69.6059	81.2653	23.3524
	70.8488	65.4003	4.9682
	72.0918	77.5894	11.4452
	73.3347	72.7618	20.9056
	74.5777	88.4571	23.163
	75.8207	103.819	34.2795
	77.0636	100.038	17.6168
	78.3066	83.8569	22.5614
	79.5496	102.618	35.0403
	80.7925	133.347	25.6721
	82.0355	150.787	28.6908
	83.2784	139.049	47.2722
	84.5214	106.329	24.9626
	85.7644	118.065	34.8671
	87.0073	120.505	36.8299
	88.2503	115.576	45.385
	89.4932	105.156	33.7557
	90.7362	102.126	44.8419
	91.9792	118.417	62.711
	93.2221	140.19	62.2636
	94.4651	174.57	71.4267
	95.7081	164.301	71.718
	96.951	140.89	49.6507
	98.194	137.905	47.8434
	99.4369	105.751	35.59
	100.68	104.543	26.9455
	101.923	105.835	25.6019
	103.166	124.732	45.3448
	104.409	117.78	29.7314
	105.652	99.9229	21.2332
	106.895	46.7205	15.5806
	108.138	31.1635	10.6204
	109.381	55.0015	12.7773
	110.624	54.9637	12.8486
	111.867	64.6928	33.6887
	113.109	75.4098	34.0444
	114.353	90.9435	29.8527
	115.595	83.2962	38.1408
	116.838	92.6118	42.4457
	118.081	104.8	47.5637
	119.324	105.957	45.4556
	120.567	107	57
	121.81	82.7523	40.3946
	123.053	77.671	13.3992
	124.296	94.3769	31.8332
	125.539	92.077	65.9381
	126.782	127.934	54.6086
	128.025	96.5164	31.6328
	129.268	100.551	38.1213
	130.511	126.297	49.7629
	131.754	108.78	34.0924
	132.997	86.5954	11.1203
	134.24	31.8027	6.1926
	135.483	8.8726	0.3204
	136.726	48.1872	9.1553
	137.969	112.387	10.1718
	139.212	88.5976	31.3337
	140.455	105.042	46.2527
	141.698	112.972	45.6071
	142.941	114.204	47.2779
	144.184	117.788	93.0982
	145.427	121.404	84.7311
	146.669	104.733	63.9516
	147.912	80.1768	76.3473
	149.155	85.5949	86.6199
	150.398	107.562	101.859
	151.641	116.723	113.85
	152.884	139.837	96.71
	154.127	116.765	54.5393
	155.37	110.414	34.6661
	156.613	65.1146	16.4469
	157.856	43.348	19.6392
	159.099	67.4233	33.3737
	160.342	105.384	69.2685
	161.585	83.0017	57.3704
	162.828	73.8075	56.3999
	164.071	65.9478	45.718
	165.314	52.1026	25.6082
	166.557	81.3301	33.961
	167.8	97.6043	62.9505
	169.043	124.415	68.0218
	170.286	101.403	98.9741
	171.529	64.1608	73.0323
	172.772	66.7771	67.096
	174.015	79.7865	73.9412
	175.258	87.097	91.7166
	176.501	98.1982	69.7469
	177.744	118.121	89.4406
	178.987	91.0071	62.8363
	180.229	121.096	69.3077
	181.472	141.464	88.516
	182.715	143.92	93.518
	183.958	143.145	92.96
	185.201	113.722	78.0978
	186.444	117.522	94.4743
	187.687	108.389	79.9872
	188.93	98.2849	76.9461
	190.173	78.9429	54.4381
	191.416	47.9942	31.9513
	192.659	86.5182	37.4303
	193.902	100.595	35.8753
	195.145	98.6816	25.1437
	196.388	104.601	26.5434
	197.631	138.385	53.9326
	198.874	152.974	86.1617
	200.117	148.031	91.9303
	201.36	166.54	92.9559
	202.603	153.045	85.7912
	203.846	140.172	95.5028
	205.089	158.612	102.71
	206.332	154.723	119.533
	207.575	136.714	114.061
	208.818	151.136	157.514
	210.06	141.593	136.38
	211.304	128.703	169.869
	212.547	81.9067	133.846
	213.789	61.3131	95.2079
	215.032	43.0504	76.4699
	216.275	41.1407	53.3197
	217.518	44.3429	66.7592
	218.761	65.3631	114.772
	220.004	53.8504	73.1442
	221.247	45.0088	59.625
	222.49	52.3429	54.9783
	223.733	59.8801	67.8433
	224.976	63.0267	84.6473
	226.219	44.6561	65.7999
	227.462	25.9049	40.441
	228.705	14.6836	22.1469
	229.948	1.9841	28.1926
	231.191	0.4868	21.4416
	232.434	1.8913	26.2617
	233.677	12.893	43.5454
	234.92	18.4372	48.7732
	236.163	6.5893	23.9353
	237.406	8.4758	5.8581
	238.649	2.2508	4.6551
	239.892	1.397	6.5793

## Sheet: Table S1D
	Supplementary Table 1D: Depth penetration of Hu2EF versus Hu2G10 in human prostate cancer - ROI 4.
	(a)																	(b)
		au
	Distance	Y1 = 2EF	Y2 = 2G10
	0	16.5556	21.3333
	1.243	36.0922	19.4265
	2.4859	22.1127	25.4046
	3.7289	20.6864	23.7153
	4.9718	26.6901	23.6656
	6.2148	27.6524	39.8571
	7.4578	28.2927	27.8591
	8.7007	9.8439	10.6808
	9.9437	13.2213	29.7667
	11.1867	17.5718	48.9241
	12.4296	19.196	33.8499
	13.6726	17.1881	39.5927
	14.9155	45.9623	75.298
	16.1585	80.6447	94.4442
	17.4015	92.6104	110.49
	18.6444	132.682	161.433
	19.8874	89.5342	101.602
	21.1304	65.3629	104.693
	22.3733	65.8345	104.659
	23.6163	44.8509	95.7705
	24.8592	72.8986	129.047
	26.1022	90.9573	144.635
	27.3452	93.2907	120.454
	28.5881	84.1727	167.005
	29.8311	116.334	171.386
	31.074	106.796	128.145
	32.317	105.134	93.9342
	33.56	109.128	94.3993
	34.8029	94.2982	94.5682
	36.0459	73.07	89.9908
	37.2889	55.4921	95.5674
	38.5318	93.2375	74.8069
	39.7748	148.569	104.586
	41.0177	126.706	102.357
	42.2607	67.8545	88.1568
	43.5037	45.2541	76.4495
	44.7466	50.8508	86.9316
	45.9896	58.1344	78.8962
	47.2325	67.202	73.3957
	48.4755	50.7385	98.8936
	49.7185	48.7257	148.315
	50.9614	102.579	128.017
	52.2044	108.17	109.177
	53.4474	91.2824	122.454
	54.6903	87.0085	91.0634
	55.9333	84.4773	88.6903
	57.1762	73.966	96.5766
	58.4192	87.1111	85.3333
	59.6622	84.8668	122.684
	60.9051	110.725	123.949
	62.1481	104.297	123.156
	63.391	107.25	80.3025
	64.634	62.7934	86.2149
	65.877	57.1029	89.3858
	67.1199	63.464	67.5712
	68.3629	69.3381	65.3038
	69.6059	67.9221	97.3302
	70.8488	72.3363	98.0186
	72.0918	83.3199	89.7934
	73.3347	113.746	111.195
	74.5777	98.4891	82.3803
	75.8207	59.2769	25.8719
	77.0636	64.9027	16.9697
	78.3066	59.8119	15.8954
	79.5496	26.533	0.8154
	80.7925	47.9878	4.8853
	82.0355	55.8981	17.4572
	83.2784	64.1762	43.1047
	84.5214	92.8339	60.2427
	85.7644	68.9998	52.8842
	87.0073	47.4084	28.8646
	88.2503	49.2763	23.2147
	89.4932	52.0724	23.0499
	90.7362	45.4404	26.1064
	91.9792	44.2997	46.1884
	93.2221	65.2479	54.2349
	94.4651	67.0573	44.368
	95.7081	72.701	42.9574
	96.951	67.2445	57.7612
	98.194	59.4488	53.0423
	99.4369	48.9808	37.4931
	100.68	69.5144	51.9416
	101.923	77.722	79.6308
	103.166	80.6323	95.3782
	104.409	96.4584	103.329
	105.652	81.8961	87.0569
	106.895	94.8236	93.9905
	108.138	76.121	74.5783
	109.381	54.4418	71.6706
	110.624	50.7448	52.9327
	111.867	70.1489	35.9147
	113.109	45.3485	43.0067
	114.353	60.4181	61.2973
	115.595	67.0258	34.2669
	116.838	113.778	78.4815
	118.081	126.013	97.6701
	119.324	112.753	89.908
	120.567	74.4496	53.5614
	121.81	39.4899	55.4099
	123.053	63.9532	85.9549
	124.296	80.2432	103.751
	125.539	102.655	123.084
	126.782	76.8447	62.8591
	128.025	53.2405	72.7649
	129.268	54.1799	68.4586
	130.511	62.454	71.0996
	131.754	63.0611	59.7885
	132.997	63.3065	85.6067
	134.24	102.415	105.953
	135.483	107.759	73.5497
	136.726	96.0513	73.2722
	137.969	116.438	75.6392
	139.212	108.818	68.0231
	140.455	127.805	98.9914
	141.698	125.532	113.563
	142.941	129.307	137.244
	144.184	166.544	168.695
	145.427	93.6617	108.888
	146.669	85.552	100.788
	147.912	105.226	142.68
	149.155	95.6086	111.794
	150.398	104.003	107.883
	151.641	57.3099	73.6981
	152.884	72.2474	84.903
	154.127	71.3274	90.7238
	155.37	57.2783	70.1056
	156.613	47.2068	78.9193
	157.856	44.4927	83.42
	159.099	67.3751	72.8029
	160.342	27.1987	38.5327
	161.585	4.2601	17.2868
	162.828	17.3329	8.8612
	164.071	16.5315	6.7644
	165.314	5.1494	4.6494
	166.557	0.3098	0.9395
	167.8	0	2.2614
	169.043	0.1221	1.02
	170.286	2.7961	0.8209
	171.529	5.646	3.2576
	172.772	10.2742	3.8213
	174.015	17.2788	10.3809
	175.258	21.5556	16.6667

## Sheet: Table S1E
	Supplementary Table 1E: Depth penetration of Hu2EF versus Hu2G10 in human prostate cancer - ROI 5.
	(a)																	(b)
		au
	Distance	Y1 = 2EF	Y2 = 2G10
	0	3.6667	13
	1.243	15.6023	11.1455
	2.4859	11.6085	35.1912
	3.7289	15.1245	27.5636
	4.9718	8.2319	29.84
	6.2148	20.9683	61.0716
	7.4578	52.4091	99.2536
	8.7007	98.3534	111.541
	9.9437	100.35	56.2437
	11.1867	59.9853	26.136
	12.4296	58.0845	26.4347
	13.6726	33.9433	49.3791
	14.9155	37.5989	63.0687
	16.1585	69.7208	80.4168
	17.4015	79.9864	94.35
	18.6444	91.8685	88.0022
	19.8874	115.551	99.0896
	21.1304	109.304	109.504
	22.3733	130.911	116.579
	23.6163	123.799	120.317
	24.8592	63.4243	78.0061
	26.1022	39.0773	59.0028
	27.3452	40.263	60.9181
	28.5881	41.0774	65.0938
	29.8311	39.5841	52.1833
	31.074	59.6247	55.2653
	32.317	81.7037	109.627
	33.56	108.415	170.441
	34.8029	137.131	179.208
	36.0459	123.079	162.292
	37.2889	110.853	140.515
	38.5318	97.7352	129.935
	39.7748	75.1703	112.165
	41.0177	69.2766	111.271
	42.2607	56.8458	106.653
	43.5037	62.2843	116.269
	44.7466	85.1374	135.428
	45.9896	102.328	146.589
	47.2325	153.449	175.203
	48.4755	161.672	162.576
	49.7185	101.932	133.224
	50.9614	95.5926	127.667
	52.2044	92.032	123.537
	53.4474	116.859	134.5
	54.6903	100.356	114.395
	55.9333	96.8763	122.559
	57.1762	80.0697	67.3292
	58.4192	118.668	84.0845
	59.6622	112.687	83.7396
	60.9051	100.206	47.9426
	62.1481	96.2436	80.9622
	63.391	88.0598	51.0425
	64.634	94.931	58.8955
	65.877	121.997	51.6488
	67.1199	132.706	89.8267
	68.3629	109.742	80.3448
	69.6059	81.0682	41.7428
	70.8488	25.7916	14.2346
	72.0918	13.1811	1.416
	73.3347	61.607	3.0075
	74.5777	68.4482	14.9157
	75.8207	39.0401	15.1797
	77.0636	38.9348	31.6307
	78.3066	65.8753	54.348
	79.5496	115.866	69.1301
	80.7925	106.551	80.792
	82.0355	85.0716	49.2633
	83.2784	49.8606	17.8885
	84.5214	40.1714	20.7134
	85.7644	46.529	36.3545
	87.0073	83.5419	74.8208
	88.2503	70.7121	84.3815
	89.4932	48.5647	121.315
	90.7362	70.8769	111.77
	91.9792	79.79	96.8248
	93.2221	84.0362	80.0219
	94.4651	71.5872	79.1397
	95.7081	55.0085	53.9436
	96.951	79.4267	52.0335
	98.194	92.2327	81.6363
	99.4369	76.5379	97.0792
	100.68	72.7765	108.175
	101.923	88.2222	116.667
	103.166	101.876	123.969
	104.409	88.8012	90.1112
	105.652	53.8274	36.6607
	106.895	48.0242	30.0321
	108.138	64.4685	42.5021
	109.381	54.0494	42.7134
	110.624	72.4228	62.1228
	111.867	138.969	102.1
	113.109	155.651	95.9847
	114.353	138.104	87.6994
	115.595	143.399	123.726
	116.838	124.835	119.44
	118.081	122.627	109.787
	119.324	108.471	127.223
	120.567	75.5836	73.4
	121.81	71.9954	86.2702
	123.053	58.0508	65.0926
	124.296	76.7464	78.9422
	125.539	107.877	147.09
	126.782	93.0569	106.04
	128.025	93.407	99.2687
	129.268	82.2587	80.2929
	130.511	60.2506	74.6004
	131.754	87.9408	98.7396
	132.997	56.6481	92.0156
	134.24	48.5051	68.3343
	135.483	47.8316	85.419
	136.726	51.1478	74.5691
	137.969	45.2988	48.9267
	139.212	28.4819	28.2673
	140.455	24.4195	27.2348
	141.698	7.286	19.4529
	142.941	3.9473	20.7406
	144.184	7.8768	20.37
	145.427	3.6355	6.4926
	146.669	10.6675	16.4091
	147.912	7.8806	8.2929
	149.155	1.908	5.0026
	150.398	0	1.3401
	151.641	2.1851	1.1204
	152.884	6.6667	1

## Sheet: Table S1F
	Supplementary Table 1F: Depth penetration of Hu2EF versus Hu2G10 in human prostate cancer - ROI 7.
	(a)																	(b)
		au
	Distance	Y1 = 2EF	Y2 = 2G10
	0	0	1.3333
	1.243	2.642	0.8479
	2.4859	11.1331	0
	3.7289	0	0
	4.9718	0	0
	6.2148	0	0
	7.4578	0.2263	0.2716
	8.7007	22.5412	2.1774
	9.9437	38.4563	0.1514
	11.1867	26.2341	6.0317
	12.4296	26.4702	6.5804
	13.6726	41.4678	25.951
	14.9155	28.2902	8.3667
	16.1585	33.3533	8.1191
	17.4015	39.6188	5.5787
	18.6444	42.9164	19.0316
	19.8874	52.3987	29.0003
	21.1304	63.2107	30.8163
	22.3733	61.2272	53.74
	23.6163	51.4646	68.5017
	24.8592	54.1618	39.1083
	26.1022	54.4245	47.719
	27.3452	48.6269	51.2269
	28.5881	40.3987	28.9174
	29.8311	55.6589	52.1817
	31.074	66.9162	72.4198
	32.317	67.9445	76.4768
	33.56	63.8531	45.8942
	34.8029	72.594	54.563
	36.0459	60.9016	54.4222
	37.2889	50.5683	45.5299
	38.5318	31.8766	44.1543
	39.7748	32.6561	30.8529
	41.0177	23.6758	28.6741
	42.2607	17.4845	46.3028
	43.5037	48.5164	71.5534
	44.7466	58.1351	86.272
	45.9896	45.2917	85.2518
	47.2325	32.1537	80.1115
	48.4755	34.7381	106.143
	49.7185	47.4501	97.1735
	50.9614	60.2529	71.7973
	52.2044	65.4048	94.9932
	53.4474	71.705	80.192
	54.6903	60.7747	64.4848
	55.9333	64.9676	50.8577
	57.1762	55.1122	54.0168
	58.4192	53.8675	61.3352
	59.6622	31.343	64.2124
	60.9051	63.5634	63.2741
	62.1481	49.2119	90.4743
	63.391	65.7029	30.5737
	64.634	57.0023	16.7229
	65.877	52.8117	15.7409
	67.1199	65.0111	17.2859
	68.3629	63.5137	37.5545
	69.6059	55.9515	56.7261
	70.8488	47.2122	59.4266
	72.0918	69.703	75.9437
	73.3347	74.1139	77.3936
	74.5777	89.7336	102.885
	75.8207	137.547	101.456
	77.0636	116.863	91.1119
	78.3066	71.1051	59.2889
	79.5496	39.7389	29.1995
	80.7925	36.4139	24.4471
	82.0355	33.1736	50.1587
	83.2784	63.3979	112.781
	84.5214	66.0088	69.6427
	85.7644	79.0628	77.3482
	87.0073	89.5723	54.8881
	88.2503	73.6567	25.5927
	89.4932	59	33.399
	90.7362	71.9976	42.5261
	91.9792	115.931	54.8553
	93.2221	112.4	58.7267
	94.4651	100.272	76.6206
	95.7081	106.947	86.3037
	96.951	63.3909	79.0895
	98.194	48.9715	71.0442
	99.4369	46.1331	66.7535
	100.68	65.5764	81.6247
	101.923	69.7076	91.2443
	103.166	58.1658	79.9956
	104.409	60.6447	47.5453
	105.652	32.7341	42.2978
	106.895	48.3486	65.9561
	108.138	66.6501	68.5098
	109.381	74.3779	49.6077
	110.624	83.293	45.589
	111.867	81.6106	35.6458
	113.109	83.46	20.3737
	114.353	85.0737	11.8429
	115.595	56.8655	8.6694
	116.838	56.7132	16.3363
	118.081	94.4681	18.7154
	119.324	78.7845	17.0235
	120.567	85.1224	43.9312
	121.81	127.016	77.091
	123.053	104.384	71.6597
	124.296	93.5121	74.2959
	125.539	62.14	44.2048
	126.782	31.2188	24.0256
	128.025	32.8753	18.8386
	129.268	67.6239	23.3922
	130.511	61.5726	41.7282
	131.754	44.8954	61.4258
	132.997	71.5994	95.6814
	134.24	95.581	100.491
	135.483	64	64.3333
	136.726	51.8733	68.849
	137.969	65.88	100.619
	139.212	87.7174	96.6766
	140.455	100.056	60.125
	141.698	54.8395	16.3464
	142.941	39.6676	40.1517
	144.184	71.1075	67.9921
	145.427	97.4647	64.7616
	146.669	111.887	47.6469
	147.912	88.3881	38.7587
	149.155	55.7851	18.6094
	150.398	34.7812	4.4794
	151.641	11.0505	8.8909
	152.884	24.5584	10.4856
	154.127	15.9375	1.2832
	155.37	23.6706	5.7002
	156.613	29.5155	12.8073
	157.856	48.8078	18.8933
	159.099	63.3989	35.1436
	160.342	60.1037	97.6333
	161.585	80.2317	51.1614
	162.828	111.482	78.0667
	164.071	127.335	72.5665
	165.314	93.1368	68.7197
	166.557	65.1575	64.0566
	167.8	55.0183	59.6424
	169.043	47.5881	86.02
	170.286	55.3165	89.4689
	171.529	60.8801	24.2208
	172.772	30.5776	19.6633
	174.015	59.2768	36.471
	175.258	122.765	80.4986
	176.501	94.7085	73.3159
	177.744	93.4803	76.8918
	178.987	80.1479	77.9692
	180.229	80.6387	83.8726
	181.472	73.6035	56.5722
	182.715	58.7085	42.9749
	183.958	63.7219	55.7808
	185.201	64.2428	54.3405
	186.444	52.943	41.5213
	187.687	49.2714	53.0045
	188.93	56.3552	109.951
	190.173	83.7747	103.579
	191.416	79.4749	65.9006
	192.659	61.0045	50.0089
	193.902	38.795	13.4942
	195.145	109.684	35.1381
	196.388	71.4494	31.1419
	197.631	60.2757	17.9293
	198.874	56.6125	38.8084
	200.117	56.4971	29.384
	201.36	48.1177	19.725
	202.603	42.7463	11.8413
	203.846	30.8953	10.2273
	205.089	38.7133	24.3133
	206.332	63.856	44.82
	207.575	63.4776	46.8267
	208.818	47.2267	61.0359
	210.06	65.3537	36.5696
	211.304	69.9142	37.7019
	212.547	83.7763	49.6987
	213.789	81.9601	46.1454
	215.032	71.4112	62.0153
	216.275	94.0957	62.5095
	217.518	94.1905	36.3513
	218.761	100.627	81.4812
	220.004	93.8667	92.3092
	221.247	99.8434	72.9503
	222.49	82.4111	66.8221
	223.733	97.272	73.2932
	224.976	86.7892	74.8808
	226.219	76.9338	71.914
	227.462	76.2962	59.8697
	228.705	80.3294	77.0646
	229.948	71.3826	128.315
	231.191	47.6444	103.906
	232.434	64.6593	63.3385
	233.677	62.6005	79.4423
	234.92	54.2812	92.3824
	236.163	59.9492	75.9737
	237.406	69.0328	67.0257
	238.649	83.9743	88.6922
	239.892	74.2121	89.5103
	241.135	40.1339	45.5521
	242.377	65.0806	74.7341
	243.62	55.93	71.3406
	244.863	70.0636	51.4607
	246.106	74.897	64.8692
	247.349	70.6698	78.9624
	248.592	87.767	103.773
	249.835	99.6092	108.74
	251.078	159.612	135.922
	252.321	149.718	99.5734
	253.564	152.206	92.3224
	254.807	127.942	103.069
	256.05	76.4761	96.8574
	257.293	55.7874	93.293
	258.536	42.2648	89.534
	259.779	22.8282	64.4999
	261.022	8.7387	64.2034
	262.265	39.938	61.8953
	263.508	38.806	97.7432
	264.751	23.4566	84.0784
	265.994	25.0314	65.6904
	267.237	25.7528	58.2054
	268.48	13.6214	42.7468
	269.723	4.0832	27.1962
	270.966	1.4444	27

## Sheet: Table S1G
	Supplementary Table 1G: Depth penetration of Hu2EF versus Hu2G10 in human prostate cancer - ROI 11.
	(a)																	(b)
		au
	Distance	Y1 = 2EF	Y2 = 2G10
	0	55	18
	1.243	34.7354	29.3123
	2.4859	27.5856	7.9086
	3.7289	36.3443	19.1358
	4.9718	58.073	32.6639
	6.2148	45.4719	45.8052
	7.4578	62.5144	40.4156
	8.7007	23.6045	35.075
	9.9437	12.6708	50.6278
	11.1867	35.6543	64.2469
	12.4296	47.7321	79.2361
	13.6726	28.0328	64.0218
	14.9155	43.2798	69.3951
	16.1585	36.7519	31.3282
	17.4015	49.0669	56.2391
	18.6444	51.6543	87.3539
	19.8874	53.9671	95.1174
	21.1304	68.1521	96.1157
	22.3733	58.679	101.407
	23.6163	99.0088	116.969
	24.8592	136.118	96.6542
	26.1022	103.138	93.428
	27.3452	102.843	128.324
	28.5881	95.0178	112.149
	29.8311	104.727	102.868
	31.074	104.567	98.0361
	32.317	56.8986	66.3812
	33.56	35.1111	58.3333
	34.8029	45.1041	66.2129
	36.0459	55.6007	70.1952
	37.2889	63.6722	77.513
	38.5318	42.9229	68.7991
	39.7748	47.0738	68.1596
	41.0177	37.4362	102.675
	42.2607	51.7285	79.5562
	43.5037	78.2984	66.896
	44.7466	60.0247	68.6543
	45.9896	63.4167	77.7991
	47.2325	90.6119	93.7534
	48.4755	90.1248	71.9767
	49.7185	113.481	91.9761
	50.9614	115.347	90.1858
	52.2044	105.239	67.6529
	53.4474	107.292	55.4109
	54.6903	50.8	73.0972
	55.9333	66.4691	61.4815
	57.1762	68.959	32.6359
	58.4192	60.7246	27.6296
	59.6622	70.107	42.8889
	60.9051	73.324	55.1404
	62.1481	89.002	37.3388
	63.391	77.4513	37.5967
	64.634	53.7874	14.7293
	65.877	30.9701	2.1843
	67.1199	27.4444	5
	68.3629	22.2397	4.8281
	69.6059	45.4586	8.9534
	70.8488	41.3745	1.6173
	72.0918	54.1855	8.0101
	73.3347	55.5211	28.6904
	74.5777	38.2826	20.535
	75.8207	29.4707	16.4102
	77.0636	39.6996	16.2327
	78.3066	19.5432	3.7407
	79.5496	36.6441	4.4339
	80.7925	49.6444	21.1632
	82.0355	74.8189	36.7901
	83.2784	66.1812	34.2661
	84.5214	85.4533	11.4746
	85.7644	40.6749	9.4239
	87.0073	29.618	6.1783
	88.2503	31.4368	9.2273
	89.4932	38.1235	20.3704
	90.7362	84.0835	43.915
	91.9792	104.217	47.5482
	93.2221	25.5062	4.2305
	94.4651	36.8677	22.963
	95.7081	72.7787	60.6158
	96.951	90.6283	57.2016
	98.194	50.5161	22.3887
	99.4369	55.4051	23.1943
	100.68	69	42
	101.923	86.0706	69.7159
	103.166	114.548	98.8162
	104.409	103.317	96.6132
	105.652	107.423	106.556
	106.895	120.798	90.0123
	108.138	57.7311	43.6008
	109.381	62.6834	57.6017
	110.624	63.5534	54.9561
	111.867	83.8025	113.938
	113.109	102.801	111.236
	114.353	112.134	113.502
	115.595	106.167	123.848
	116.838	172.108	149.723
	118.081	132.09	137.641
	119.324	110.422	101.332
	120.567	100.418	110.214
	121.81	107.881	128.904
	123.053	121.185	128.951
	124.296	80.8901	83.9099
	125.539	61.7296	73.792
	126.782	58.166	75.4307
	128.025	91.93	99.916
	129.268	131.044	94.0686
	130.511	121.849	72.5734
	131.754	98.1497	71.3687
	132.997	109.049	66.1908
	134.24	91.7778	68.8889
	135.483	82.9489	76.6433
	136.726	75.0434	70.8692
	137.969	94.7462	58.7174
	139.212	121.507	71.9209
	140.455	98.6165	94.6369
	141.698	84.7901	54.5364
	142.941	92.9093	63.5966
	144.184	106.071	99.6996
	145.427	92.9259	100.284
	146.669	70.9028	74.9456
	147.912	104.589	102.062
	149.155	86.0562	92.8025
	150.398	85.4187	87.3073
	151.641	85.9485	83.3121
	152.884	96.6241	83.2318
	154.127	99.9832	83.4542
	155.37	83.9375	55.831
	156.613	111.728	122.494
	157.856	113.86	133.926
	159.099	123.279	110.246
	160.342	121.722	65.7874
	161.585	101.312	87.2375
	162.828	96.4467	57.4475
	164.071	100.059	108.523
	165.314	145.576	130.736
	166.557	185.805	198.501
	167.8	176.444	207.222
	169.043	155.889	207.857
	170.286	177.257	167.478
	171.529	160.449	171.384
	172.772	194.681	173.891
	174.015	169.263	160.106
	175.258	171.864	159.008
	176.501	171.566	156.641
	177.744	132.035	125.678
	178.987	63.5062	81.037
	180.229	55.5267	90.3077
	181.472	50.5559	74.3771
	182.715	59.6063	83.4376
	183.958	78.526	116.844
	185.201	104.703	169.789
	186.444	113.176	169.595
	187.687	101.561	136.573
	188.93	92.0895	111.677
	190.173	86.2963	107.296
	191.416	96.6397	145.856
	192.659	89.7944	168.081
	193.902	46.273	79.2428
	195.145	10.2332	49.3538
	196.388	11.5452	29.8866
	197.631	20.4705	22.8395
	198.874	21.4243	22.7203
	200.117	36.8855	26.326
	201.36	26	21

## Sheet: Table S1H
	Supplementary Table 1H: Depth penetration of Hu2EF versus Hu2G10 in human prostate cancer - ROI 12.
	(a)																		(b)
		au
	Distance	Y1 = 2EF	Y2 = 2G10
	0	9	0
	1.243	8.2861	5.6965
	2.4859	17.0232	5.1757
	3.7289	16.5176	11.4413
	4.9718	36.7039	24.9604
	6.2148	52.0577	62.0313
	7.4578	105.95	108.893
	8.7007	91.5484	103.087
	9.9437	97.3268	113.962
	11.1867	149.161	133.925
	12.4296	181.191	186.388
	13.6726	202.847	212.924
	14.9155	137.56	144.66
	16.1585	126.133	98.1703
	17.4015	125.886	110.458
	18.6444	98.746	87.3655
	19.8874	77.1303	58.4768
	21.1304	57.49	57.0184
	22.3733	62.5662	70.6554
	23.6163	41.5367	49.4053
	24.8592	74.268	62.7808
	26.1022	117.502	132.073
	27.3452	123.316	156.508
	28.5881	140.053	146.479
	29.8311	176.729	166.65
	31.074	159.34	142.868
	32.317	123.913	94.1172
	33.56	106.435	57.2155
	34.8029	87.7374	49.8492
	36.0459	97.6832	70.6485
	37.2889	96.8354	66.9368
	38.5318	130.892	71.874
	39.7748	149.497	125.081
	41.0177	122.245	120.756
	42.2607	68.8514	94.088
	43.5037	87.0979	109.159
	44.7466	81.2238	107.721
	45.9896	74.7736	75.9312
	47.2325	90.7384	67.3894
	48.4755	114.316	77.5328
	49.7185	148.25	82.3229
	50.9614	153.012	67.4423
	52.2044	137.935	73.5285
	53.4474	114.212	63.21
	54.6903	132.968	53.5256
	55.9333	117.115	51.5078
	57.1762	93.29	86.2024
	58.4192	98.6853	59.0166
	59.6622	131.738	91.5817
	60.9051	60.0374	46.8249
	62.1481	41.6306	26.9103
	63.391	35.8593	50.7956
	64.634	47.5132	31.312
	65.877	44.3189	24.3078
	67.1199	65.3355	37.0297
	68.3629	65.5846	44.7726
	69.6059	48.3634	47.9066
	70.8488	44.6427	26.2534
	72.0918	52.3015	11.989
	73.3347	81.0704	31.0394
	74.5777	81.6986	37.1858
	75.8207	82.5714	30.4314
	77.0636	76.7667	22.6403
	78.3066	72.9162	32.6584
	79.5496	64.9826	52.6702
	80.7925	84.7114	13.6919
	82.0355	71.4977	4.2109
	83.2784	109.923	27.6351
	84.5214	85.9787	9.2009
	85.7644	63.9235	9.2666
	87.0073	65.4807	14.7023
	88.2503	85.9862	37.0683
	89.4932	69.1669	40.6906
	90.7362	75.1955	43.3548
	91.9792	87.6292	46.4947
	93.2221	106.011	70.3457
	94.4651	86.9513	77.8386
	95.7081	92.3451	81.2503
	96.951	97.0977	99.4707
	98.194	68.1402	71.6628
	99.4369	73.5441	74.9883
	100.68	81.3461	56.883
	101.923	79.8586	109.67
	103.166	81.0598	47.7953
	104.409	64.7529	59.9002
	105.652	76.4908	83.9372
	106.895	75.3315	86.5424
	108.138	65.4471	82.1088
	109.381	78.0347	76.4324
	110.624	95.4126	78.9123
	111.867	129.656	88.1546
	113.109	163.539	105.11
	114.353	121.06	87.9552
	115.595	80.4563	71.8256
	116.838	71.506	68.4064
	118.081	56.8312	46.2317
	119.324	64.6928	61.2922
	120.567	85.6617	80.3024
	121.81	103.064	94.0836
	123.053	137.038	112.078
	124.296	75.6261	83.3548
	125.539	80.4594	94.1505
	126.782	109.581	135.176
	128.025	109.584	123.453
	129.268	108.196	135.472
	130.511	101.487	109.016
	131.754	108.109	99.5648
	132.997	113.526	105.315
	134.24	92.0093	98.3103
	135.483	94.2259	101.446
	136.726	134.935	110.802
	137.969	158.87	164.596
	139.212	187.306	183.903
	140.455	192.175	170.218
	141.698	209.84	162.264
	142.941	132.815	148.793
	144.184	117.94	114.973
	145.427	107.477	105.351
	146.669	128.798	161.156
	147.912	134.095	221.09
	149.155	102.239	176.572
	150.398	69.796	115.769
	151.641	47.1094	101.862
	152.884	47.3969	100.189
	154.127	37.5015	79.9299
	155.37	14.1997	50.5267
	156.613	14.9792	25.8661
	157.856	16.5603	31.3268
	159.099	33.7109	40.7847
	160.342	10.1217	32.5413
	161.585	4.4009	16.4774
	162.828	7	15

## Sheet: Table S1I
	Supplementary Table 1I: Depth penetration of Hu2EF versus Hu2G10 in human prostate cancer ROI 13.
	(a)																	(b)
		au
	Distance	Y1 = 2EF	Y2 = 2G10
	0	7	17.25
	1.243	10.1977	20.7615
	2.4859	15.5801	16.1784
	3.7289	20.5193	38.7634
	4.9718	45.8173	75.6902
	6.2148	86.4028	80.9404
	7.4578	85.5799	114.425
	8.7007	67.4707	84.3587
	9.9437	103.284	89.735
	11.1867	69.4823	49.2029
	12.4296	49.2848	56.6038
	13.6726	81.5917	36.3905
	14.9155	118.844	62.55
	16.1585	110.967	71.5372
	17.4015	123.279	57.7754
	18.6444	168.892	83.5926
	19.8874	188.692	117.984
	21.1304	152.791	112.85
	22.3733	102.049	76.6174
	23.6163	73.5889	49.8896
	24.8592	69.0716	70.0883
	26.1022	52.9327	63.8916
	27.3452	71.3121	65.7441
	28.5881	67.7741	71.7782
	29.8311	46.7941	41.6327
	31.074	106.965	64.9236
	32.317	110.822	67.4876
	33.56	103.278	72.3595
	34.8029	103.833	59.2423
	36.0459	89.3525	60.2628
	37.2889	107.771	60.5463
	38.5318	122.234	78.0014
	39.7748	111.868	93.1387
	41.0177	77.0059	69.6923
	42.2607	69.4374	47.5367
	43.5037	74.965	54.8017
	44.7466	105.289	70.5801
	45.9896	140.369	77.3943
	47.2325	124.302	71.7356
	48.4755	87.8347	42.0826
	49.7185	66.5652	56.4737
	50.9614	60.6686	52.5662
	52.2044	61.6074	42.595
	53.4474	57.2869	32.2186
	54.6903	69.179	42.2929
	55.9333	101.919	69.4952
	57.1762	136.162	90.464
	58.4192	134.564	74.2685
	59.6622	99.4016	40.6404
	60.9051	66.3782	34.1335
	62.1481	53.4175	42.1809
	63.391	70.5266	20.3775
	64.634	64.6488	13.7541
	65.877	93.9721	26.9519
	67.1199	69.0708	14.4625
	68.3629	98	13.0473
	69.6059	118.406	19.5149
	70.8488	100.495	28.1333
	72.0918	68.1635	23.2608
	73.3347	65.1662	26.0496
	74.5777	82.2572	30.9147
	75.8207	107.468	32.8355
	77.0636	123.515	54.4895
	78.3066	129.864	75.5527
	79.5496	170.241	87.8572
	80.7925	146.289	81.9091
	82.0355	128.871	59.0192
	83.2784	105.571	56.2491
	84.5214	129.085	41.0394
	85.7644	97.4809	37.5774
	87.0073	104.552	47.8377
	88.2503	83.1814	35.5163
	89.4932	79.3172	28.0766
	90.7362	80.097	34.9207
	91.9792	79.5837	33.8274
	93.2221	110.923	27.5289
	94.4651	131.544	39.304
	95.7081	106.858	27.4083
	96.951	101.727	20.6157
	98.194	122.886	20.1085
	99.4369	142.216	20.5528
	100.68	106.718	34.2769
	101.923	137.792	39.8954
	103.166	122.67	26.2675
	104.409	143.584	38.8651
	105.652	124.681	46.2739
	106.895	110.814	71.817
	108.138	88.4943	51.4153
	109.381	38.3491	19.753
	110.624	43.3395	41.7136
	111.867	92.8972	90.7267
	113.109	114.612	95.3719
	114.353	94.5351	85.6758
	115.595	77.4093	70.9652
	116.838	81.8583	56.3233
	118.081	115.608	69.8671
	119.324	128.635	93.5983
	120.567	94.396	98.8487
	121.81	114.374	97.1845
	123.053	135.468	112.805
	124.296	136.338	129.891
	125.539	105.205	97.8944
	126.782	113.646	103.541
	128.025	98.8602	94.2088
	129.268	71.1715	55.2169
	130.511	80.076	60.2378
	131.754	117.207	97.1031
	132.997	129.775	119.035
	134.24	108.62	92.1841
	135.483	108.929	86.8841
	136.726	139.47	109.583
	137.969	165.37	138.534
	139.212	118.833	170.209
	140.455	95.8501	113.775
	141.698	62.2862	89.8644
	142.941	43.0922	78.2128
	144.184	43.2031	59.3649
	145.427	66.2149	77.719
	146.669	82.491	98.032
	147.912	60.5537	98.7897
	149.155	41.539	86.6272
	150.398	50.8876	66.4201
	151.641	75.6986	85.384
	152.884	87.6758	92.1888
	154.127	106.585	100.314
	155.37	117.127	153.171
	156.613	64.9301	134.107
	157.856	64.8439	111.428
	159.099	66.8613	72.9936
	160.342	63.7349	65.127
	161.585	47.1012	66.031
	162.828	45.7976	83.6188
	164.071	63.5355	64.892
	165.314	60.5527	78.6733
	166.557	58.3565	80.9242
	167.8	48.3237	72.4798
	169.043	31.9883	65.5215
	170.286	27.1984	61.5474
	171.529	33.1742	51.1213
	172.772	28.4645	41.6486
	174.015	18.2467	49.8271
	175.258	15.4683	29.7374
	176.501	23.5283	28.7159
	177.744	35	39

## Sheet: Table S1J
	Supplementary Table 1J: Depth penetration of Hu2EF versus Hu2G10 in human prostate cancer - ROI 14.
	(a)																	(b)
		au
	Distance	Y1 = 2EF	Y2 = 2G10
	0	16	15
	1.243	9.0579	1.4867
	2.4859	24.3768	0.1184
	3.7289	16.542	3.219
	4.9718	23.7123	4.3373
	6.2148	24.506	0.4799
	7.4578	56.4784	26.4487
	8.7007	64.0171	54.0775
	9.9437	65.8313	62.6748
	11.1867	73.2215	57.1489
	12.4296	53.1935	34.6783
	13.6726	40.5265	35.4326
	14.9155	34.011	44.5967
	16.1585	47.5561	56.75
	17.4015	57.5005	68.4449
	18.6444	70.0781	67.1486
	19.8874	93.9335	68.3716
	21.1304	83.8679	70.6499
	22.3733	78.1614	59.7908
	23.6163	104.255	60.513
	24.8592	117.071	81.639
	26.1022	124.814	126.323
	27.3452	129.494	132.552
	28.5881	136.26	129.677
	29.8311	139.729	129.237
	31.074	113.786	121.767
	32.317	64.2889	106.28
	33.56	56.2755	97.5893
	34.8029	72.5407	101.499
	36.0459	106.056	159.343
	37.2889	134.089	208.4
	38.5318	128.404	166.737
	39.7748	129.175	167.617
	41.0177	141.529	107.972
	42.2607	162.023	105.642
	43.5037	138.932	86.9842
	44.7466	108.798	92.0135
	45.9896	100.574	94.5893
	47.2325	79.9704	98.458
	48.4755	40.3067	57.7196
	49.7185	38.3773	56.3851
	50.9614	50.4224	58.7117
	52.2044	60.579	92.0852
	53.4474	97.1706	110.74
	54.6903	115.902	102.211
	55.9333	143.86	111.478
	57.1762	131.067	52.772
	58.4192	139.124	50.8332
	59.6622	141.386	39.8942
	60.9051	110.635	28.1022
	62.1481	61.7428	21.3706
	63.391	83.1613	18.5208
	64.634	98.214	28.3029
	65.877	103.951	37.3382
	67.1199	81.8618	32.7457
	68.3629	111.413	49.2138
	69.6059	135.517	61.7071
	70.8488	147.026	64.8082
	72.0918	152.914	59.9897
	73.3347	138.959	72.7078
	74.5777	115.146	68.2934
	75.8207	115.817	93.1065
	77.0636	109.303	89.2722
	78.3066	83.3816	67.983
	79.5496	86.6204	80.4477
	80.7925	110.875	88.8389
	82.0355	109.277	87.6014
	83.2784	137.819	122.746
	84.5214	187.426	174.422
	85.7644	179.58	145.24
	87.0073	154.8	98.5474
	88.2503	145.182	94.9956
	89.4932	128.58	89.4398
	90.7362	118.257	83.0827
	91.9792	107.99	93.8715
	93.2221	114.738	106.621
	94.4651	77.6895	129.773
	95.7081	21.1569	82.6564
	96.951	27.4453	46.9231
	98.194	21.0614	24.1045
	99.4369	25.0054	32.2296
	100.68	36.335	36.6284
	101.923	38.912	14.7322
	103.166	26	24

[truncated: 1 more sheets: Table S1K]
